# Supplementary material for: Human Serum Albumin Facilitates Heme-Iron Utilization by Fungi
Source: PubMed Central journal article supplement (PMC7175094; doi:10.1128/mbio.00607-20), 2020-04-21
Supplement: mBio.00607-20-st001.pdf [file mBio.00607-20-st001.pdf]

**Table S1.** Summary of the effect of HSA-binding drugs on *C. albicans* growth and on heme utilization stimulated by 5  $\mu$ M HSA.

Growth was tested with the *C. albicans* KC2 (*CCC2*) strain in YPD medium + 1 mM ferrozine, and with the KC68 (*ccc2<sup>-/-</sup>*) strain in the same medium supplemented with 3  $\mu$ M hemin. HSA-heme utilization was tested in the KC68 background, in the same medium supplemented with 5  $\mu$ M HSA and 0.3  $\mu$ M hemin.

| Drug                          | Minimal inhibitory concentration for HSA-heme utilization | Minimal inhibitory concentration for growth |
|-------------------------------|-----------------------------------------------------------|---------------------------------------------|
| <u>Allosteric drugs</u>       |                                                           |                                             |
| Ibuprofen                     | -                                                         | 4 mM                                        |
| Warfarin                      | -                                                         | > 4 mM                                      |
| Rifampicin                    | -                                                         | > 2 mM                                      |
| Isoniazid                     | -                                                         | > 2 mM                                      |
| <u>Direct-competing drugs</u> |                                                           |                                             |
| Salicylic acid                | 1 mM                                                      | 5 mM                                        |
| Naproxen                      | 0.13 mM                                                   | 2 mM                                        |
| Camptothecin                  | -                                                         | > 0.15 mM                                   |
| Fusidic acid                  | -                                                         | 4 mM                                        |
