# Supplementary material for: Human Serum Albumin Facilitates Heme-Iron Utilization by Fungi
Source: PubMed Central journal article supplement (PMC7175094; doi:10.1128/mbio.00607-20), 2020-04-21
Supplement: mBio.00607-20-st002.pdf [file mBio.00607-20-st002.pdf]

**Table S2.** List of fungal strains.

| Name                                   | Genotype / strain number            | Origin                                           |
|----------------------------------------|-------------------------------------|--------------------------------------------------|
| <u><i>Candida albicans</i> strains</u> |                                     |                                                  |
| KC2 = CAI4                             | <i>ura3Δ::imm434/ura3Δ::imm434</i>  | (1)                                              |
| KC68                                   | KC2 <i>ccc2Δ::hisG/ccc2Δ::hisG</i>  | (2)                                              |
| KC139                                  | KC68 <i>rbt5Δ::hisG/rbt5Δ::hisG</i> | (3)                                              |
| KC485                                  | KC68 <i>pga7Δ::hisG/pga7Δ::hisG</i> | (4)                                              |
| KC782                                  | KC68 <i>csa2Δ::hisG/csa2Δ::hisG</i> | (5)                                              |
| <u>Other fungal species</u>            |                                     |                                                  |
| <i>Candida parapsilosis</i>            | Y2315                               | ARS NRRL <sup>a</sup>                            |
| <i>Candida auris</i>                   | Clinical isolate                    | Tel-Aviv Sourasky medical center – Ronen Ben-Ami |
| <i>Lodderomyces elongisporus</i>       | CBS 2605                            | CBS <sup>b</sup>                                 |
| <i>Meyerozima farinosa</i>             | CBS 185                             | CBS                                              |
| <i>Pichia stipitis</i>                 | CBS 5773                            | CBS                                              |

<sup>a</sup> ARS NRRL = Agricultural Research Service culture collection, Peoria, IL

<sup>b</sup> CBS = Centraalbureau voor Schimmelcultures, Utrecht, The Netherlands.

#### SUPPLEMENTAL REFERENCES

1. Fonzi WA, Irwin MY. 1993. Isogenic strain construction and gene mapping in *Candida albicans*. *Genetics* 134:717–728.
2. Weissman Z, Shemer R, Kornitzer D. 2002. Deletion of the copper transporter CaCCC2 reveals two distinct pathways for iron acquisition in *Candida albicans*. *Mol Microbiol* 44:1551–1560.
3. Weissman Z, Kornitzer D. 2004. A family of *Candida* cell surface haem-binding proteins involved in haemin and haemoglobin-iron utilization. *Mol Microbiol* 53:1209–1220.
4. Kuznets G, Vigonsky E, Weissman Z, Lalli D, Gildor T, Kauffman SJ, Turano P, Becker J, Lewinson O, Kornitzer D. 2014. A Relay Network of Extracellular Heme-Binding Proteins Drives *C. albicans* Iron Acquisition from Hemoglobin. *PLoS Pathog* 10:e1004407.
5. Nasser L, Weissman Z, Pinsky M, Amartely H, Dvir H, Kornitzer D. 2016. Structural basis of haem-iron acquisition by fungal pathogens. *Nat Microbiol* 1:16156.
